# Supplementary material for: Genome-Wide Association Studies and Heritability Estimates of Body Mass Index Related Phenotypes in Bangladeshi Adults
Source: PubMed Central journal article supplement (PMC4136799; doi:10.1371/journal.pone.0105062), 2014-08-18

# (a) BMI - Males

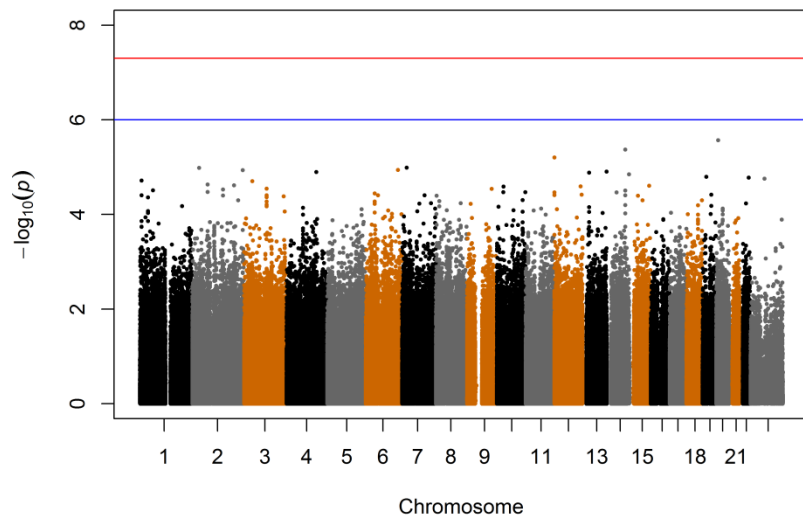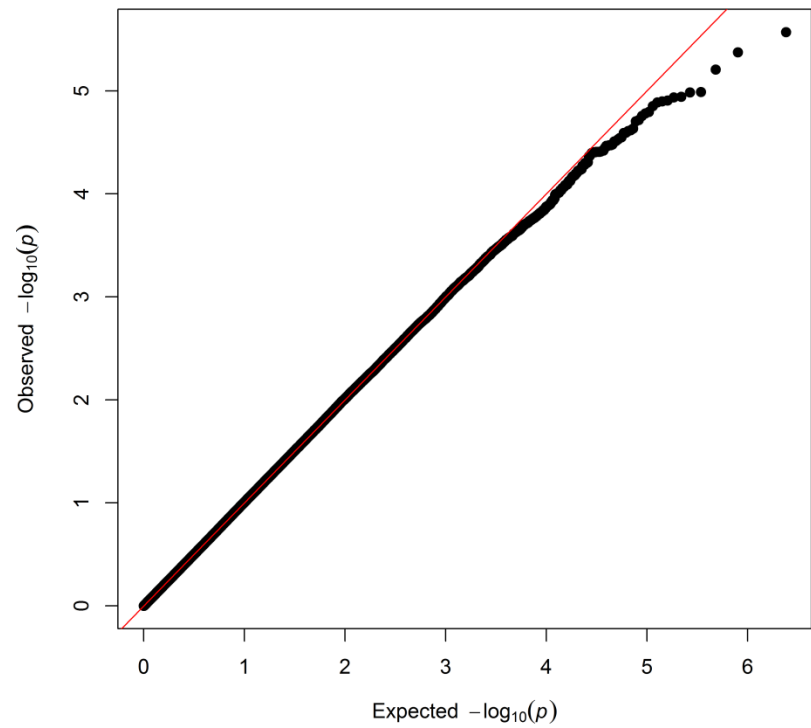

# (b) BMI - Females

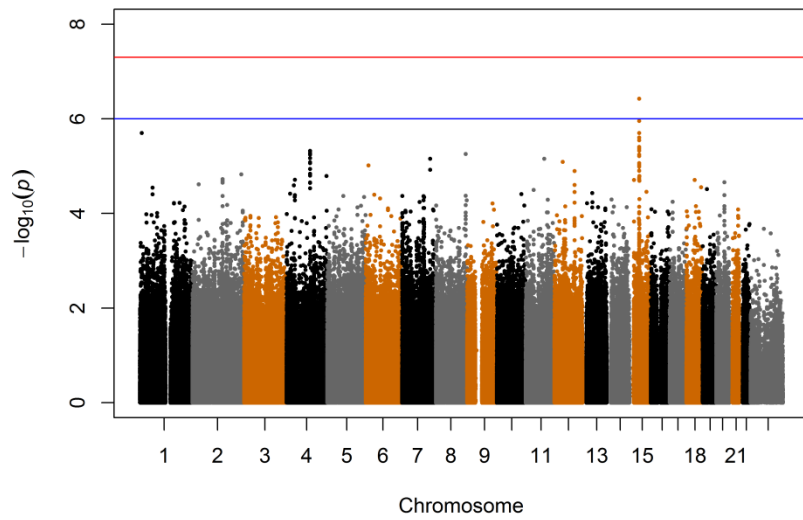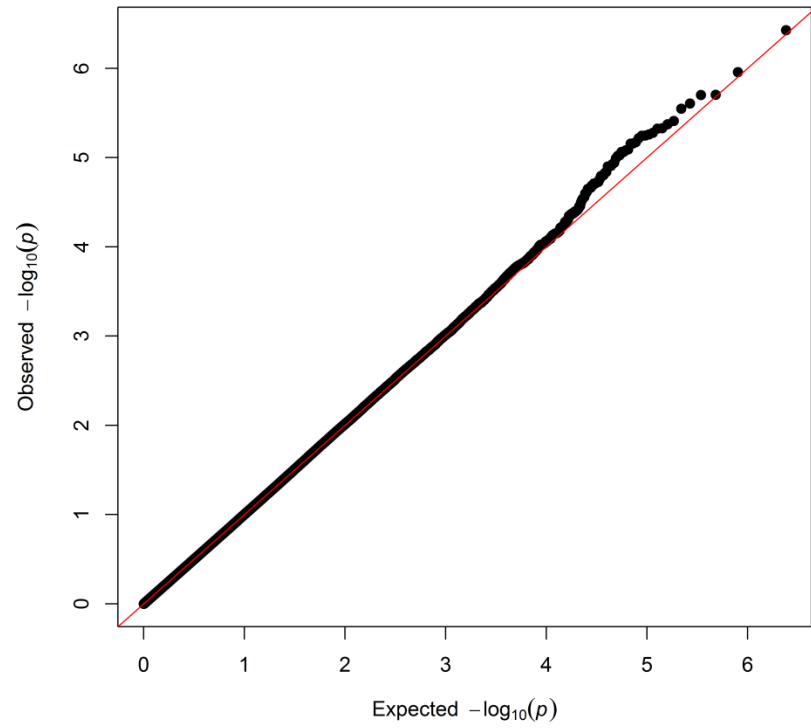

# (c) Height - Males

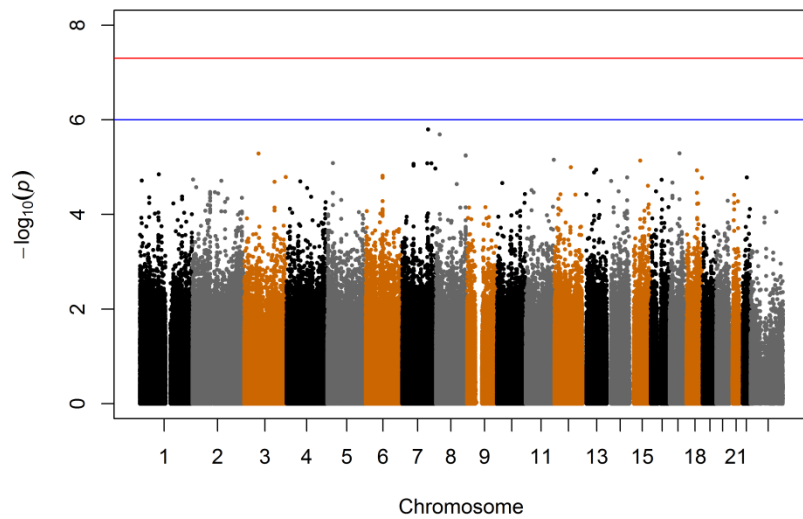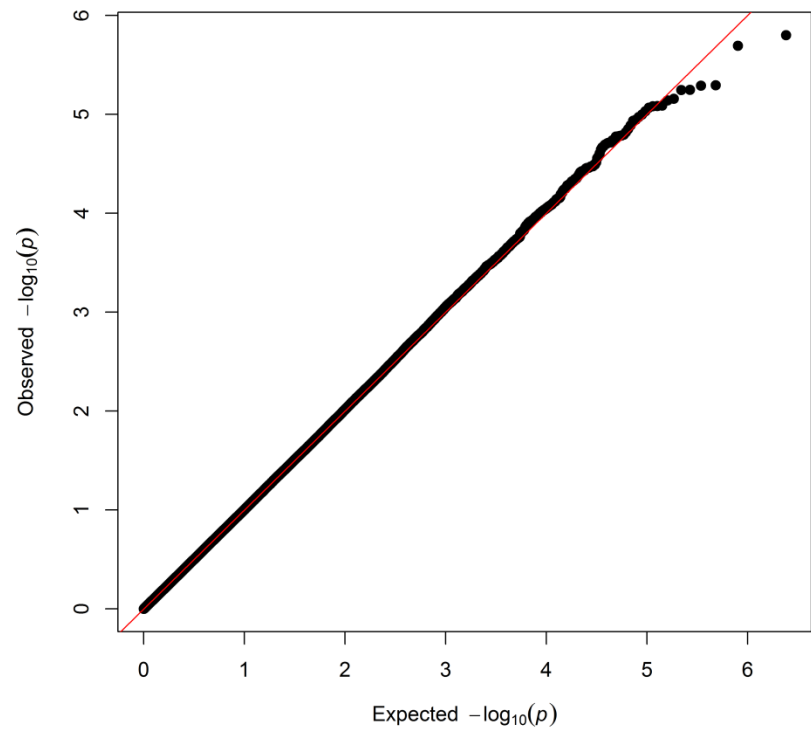

# (d) Height - Females

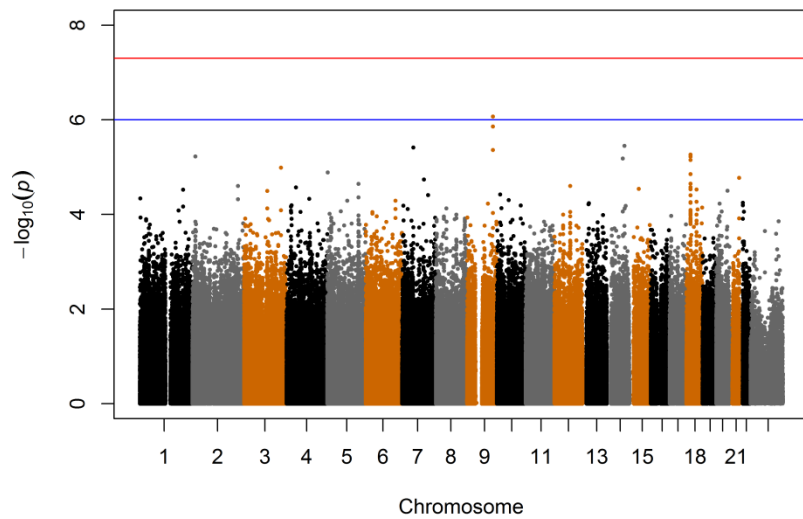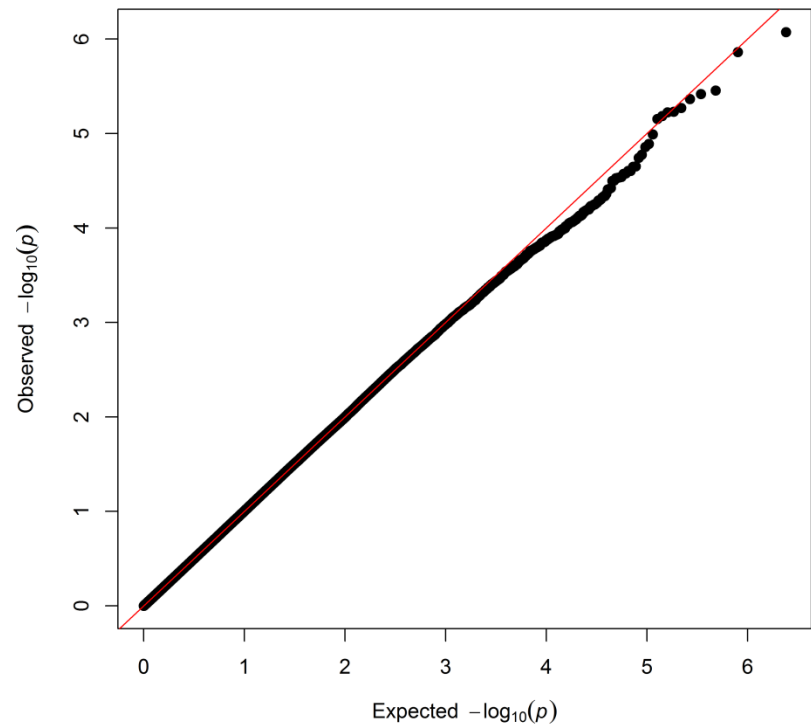

# (e) Underweight - Males

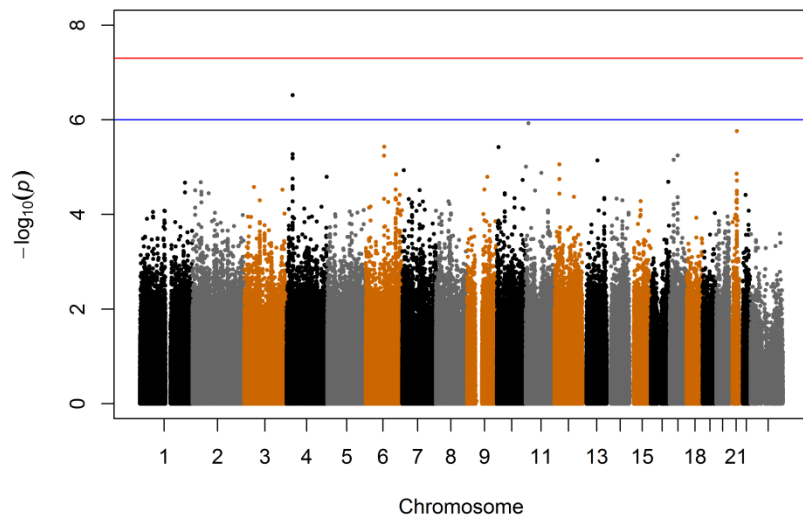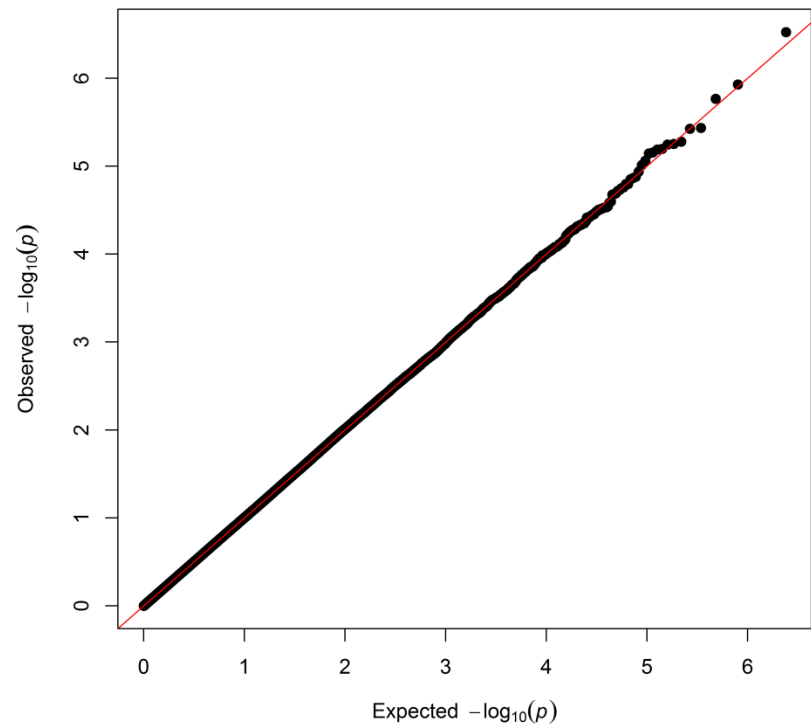

# (f) Underweight - Females

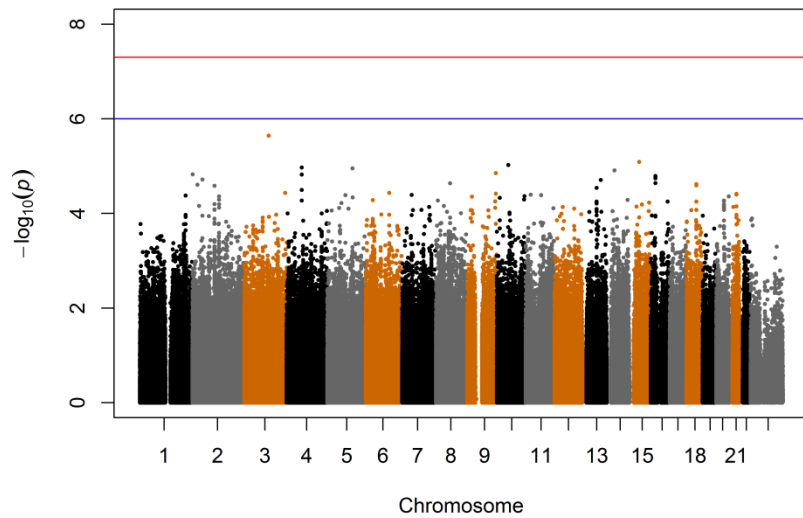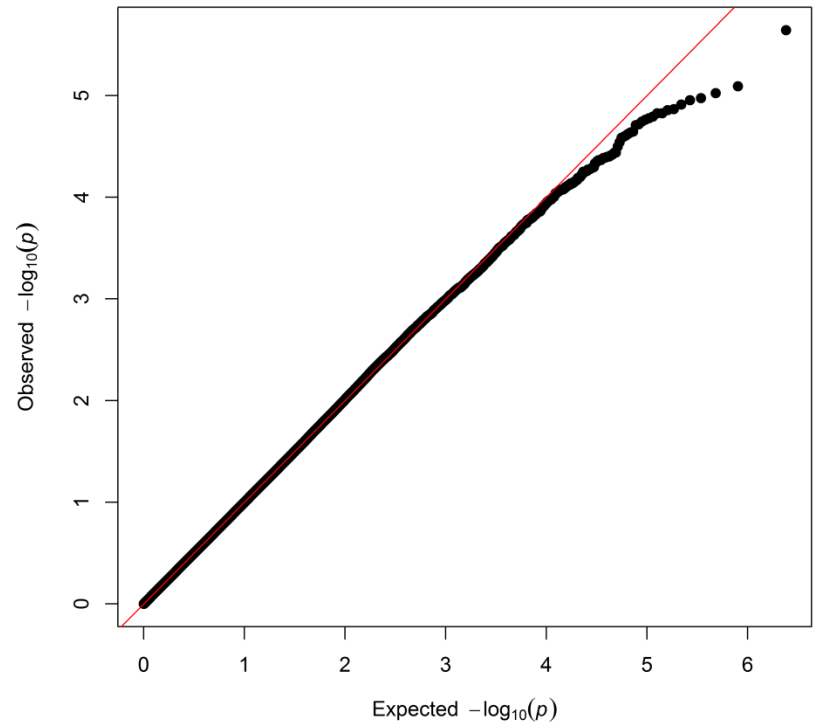

# (g) Overweight – Males

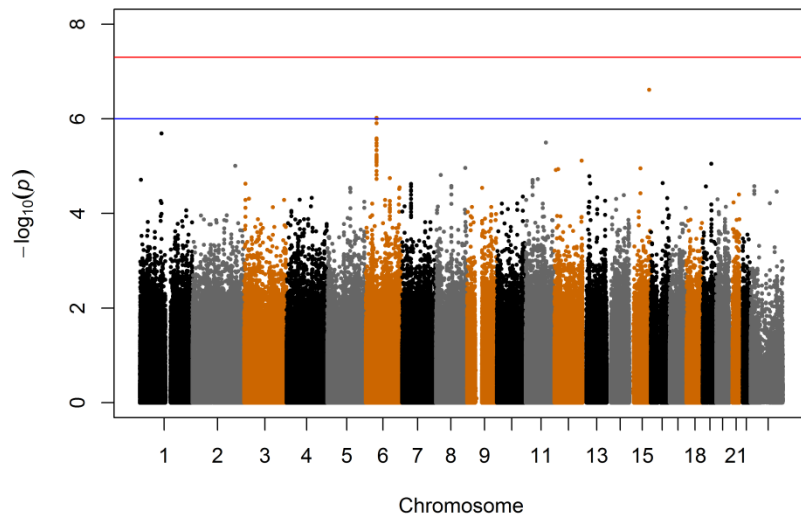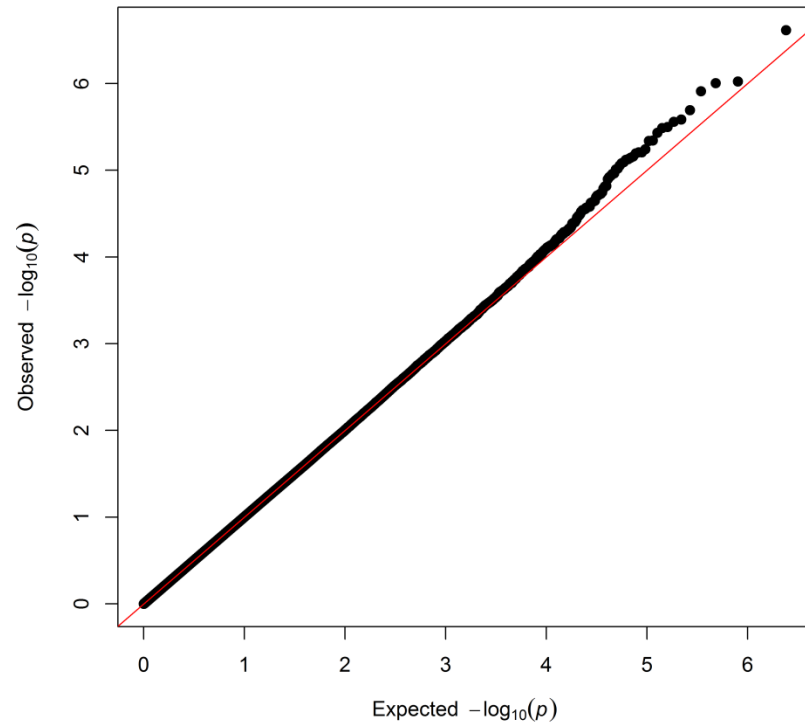

# (h) Overweight - Females

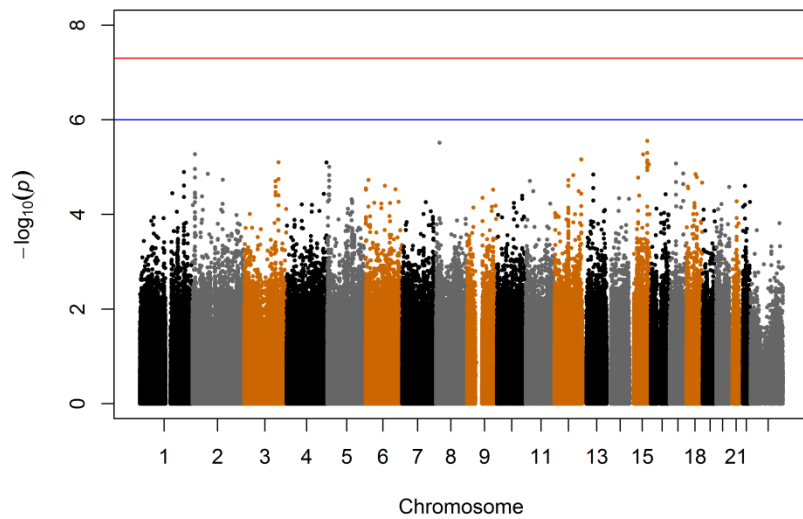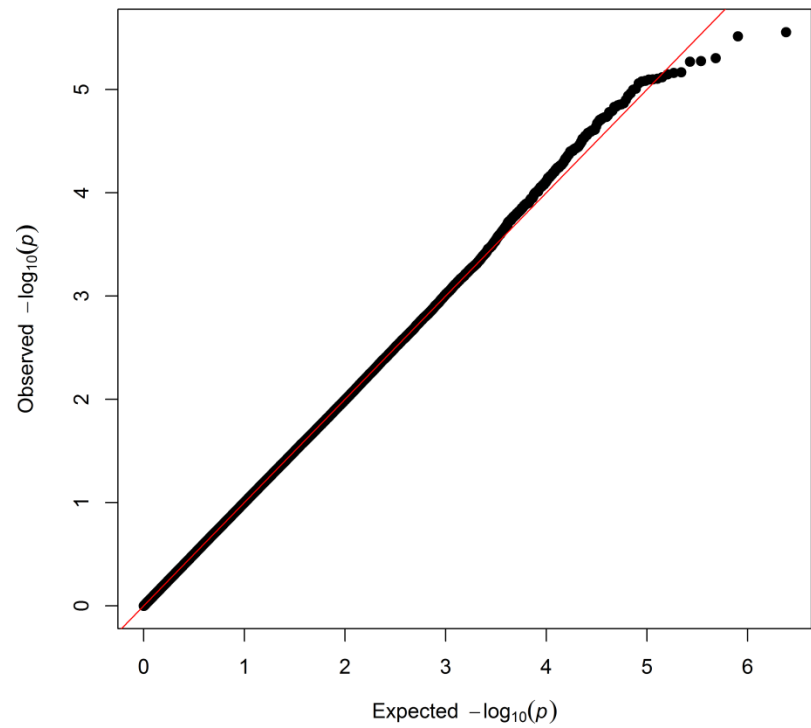



# (i) Change in BMI - Males

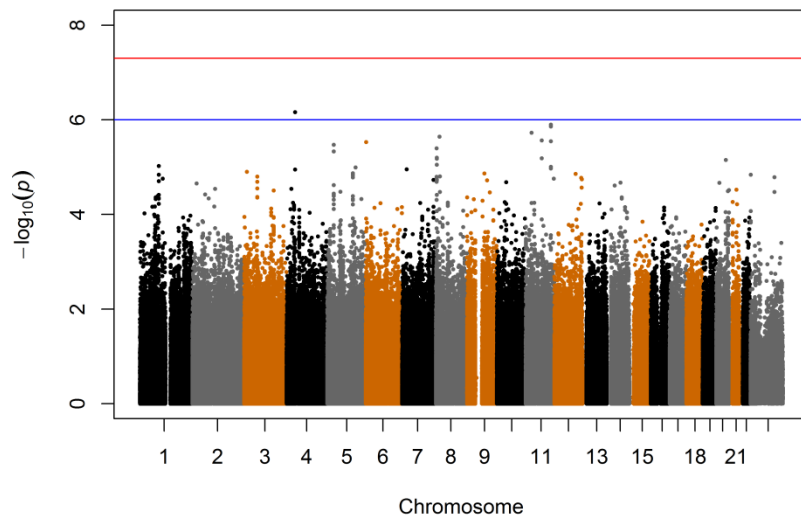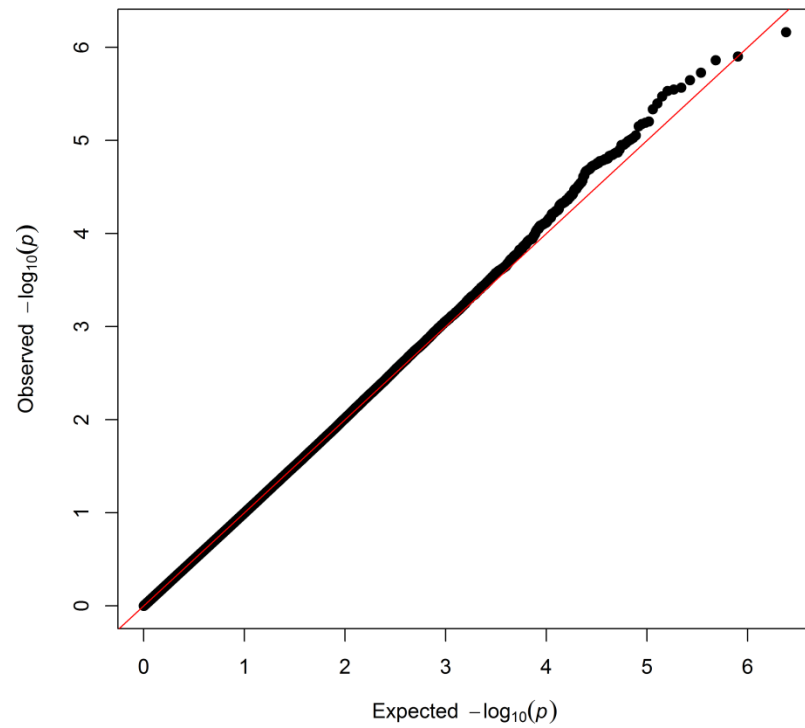

Supplement: pone.0105062.s002.pdf [file pone.0105062.s002.pdf]
