# Supplementary material for: Genome-Wide Association Studies and Heritability Estimates of Body Mass Index Related Phenotypes in Bangladeshi Adults
Source: PubMed Central journal article supplement (PMC4136799; doi:10.1371/journal.pone.0105062), 2014-08-18

# (a) BMI – Underweight at Baseline

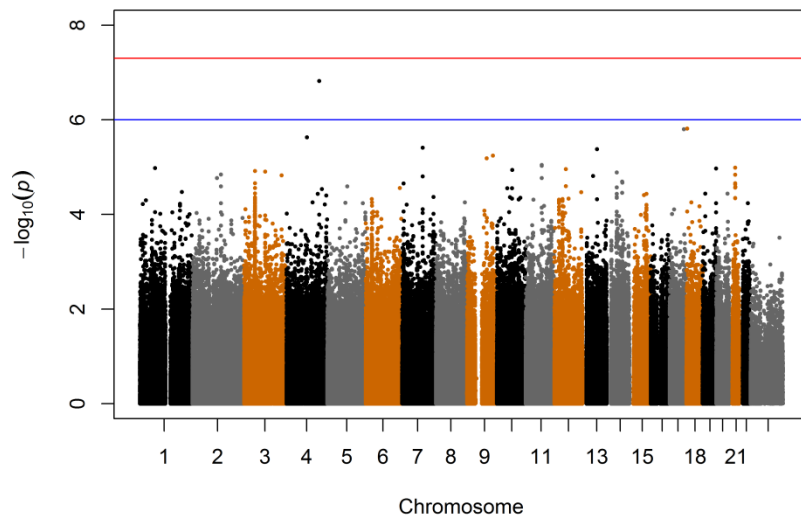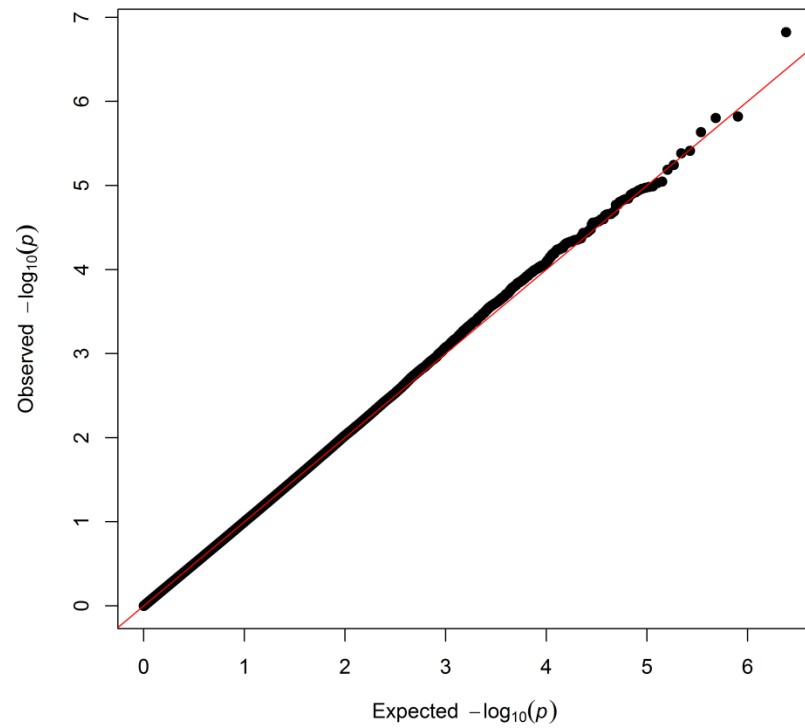

## (b) BMI – Normal Weight at Baseline

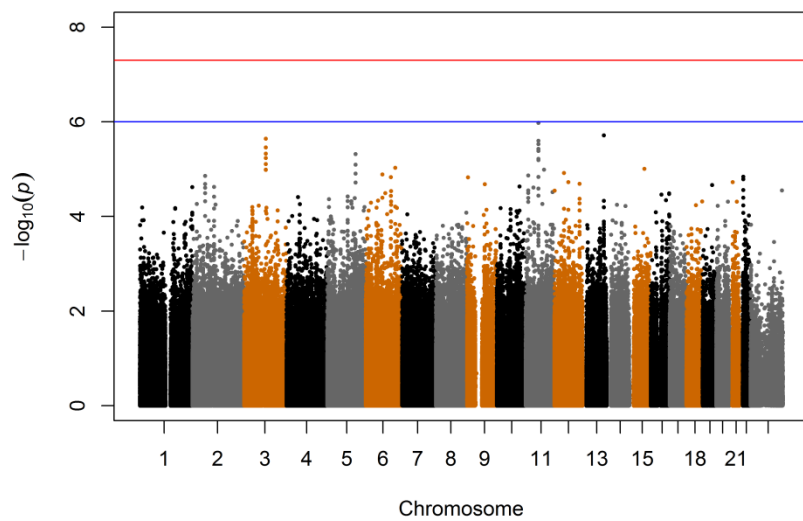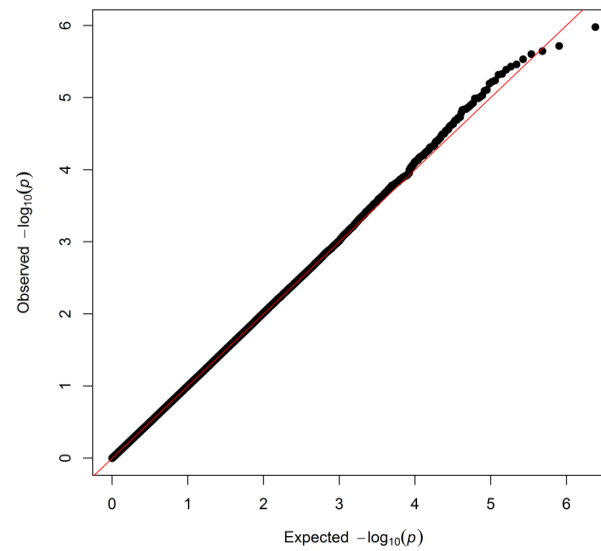

# (c) BMI – Overweight at Baseline

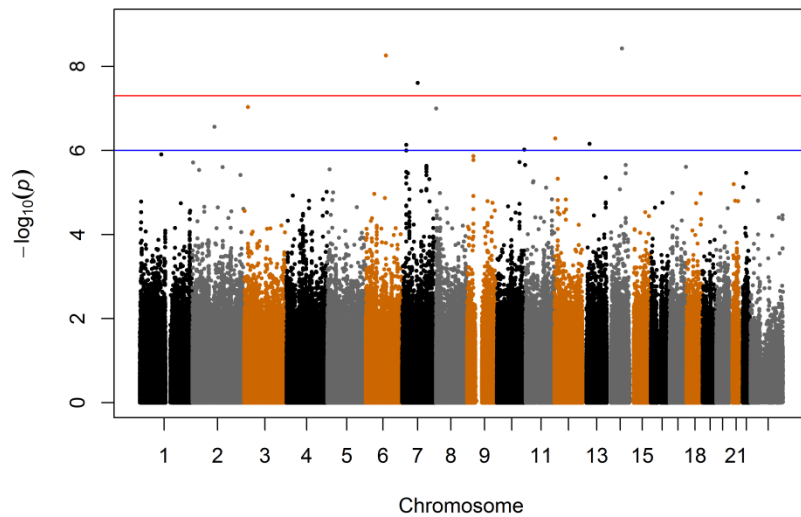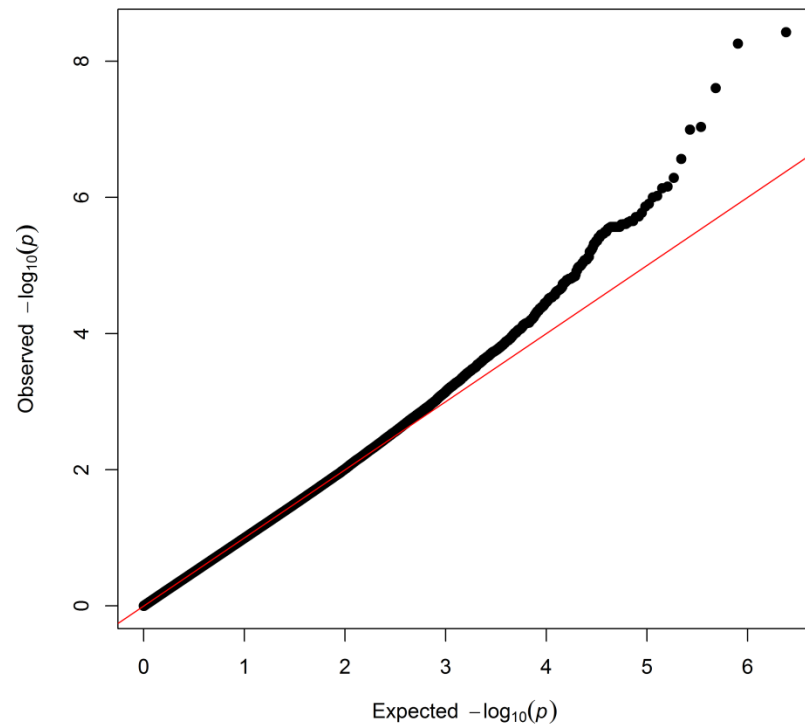

# (d) BMI – Overweight at Baseline No Outlier

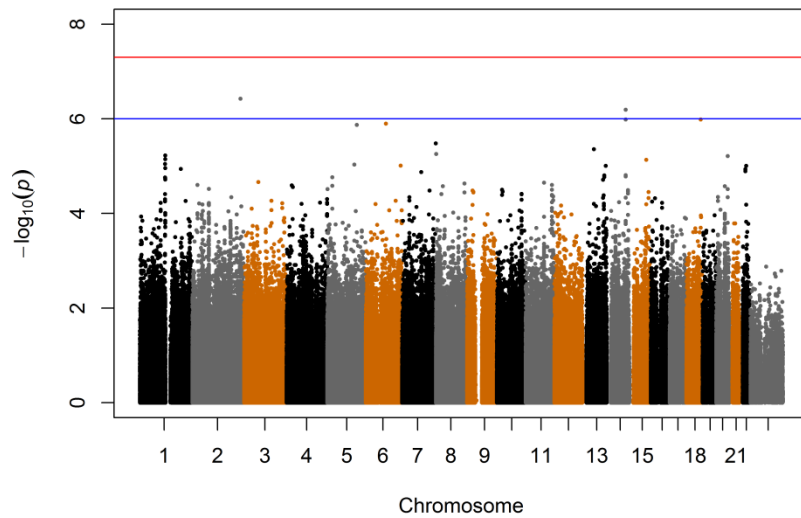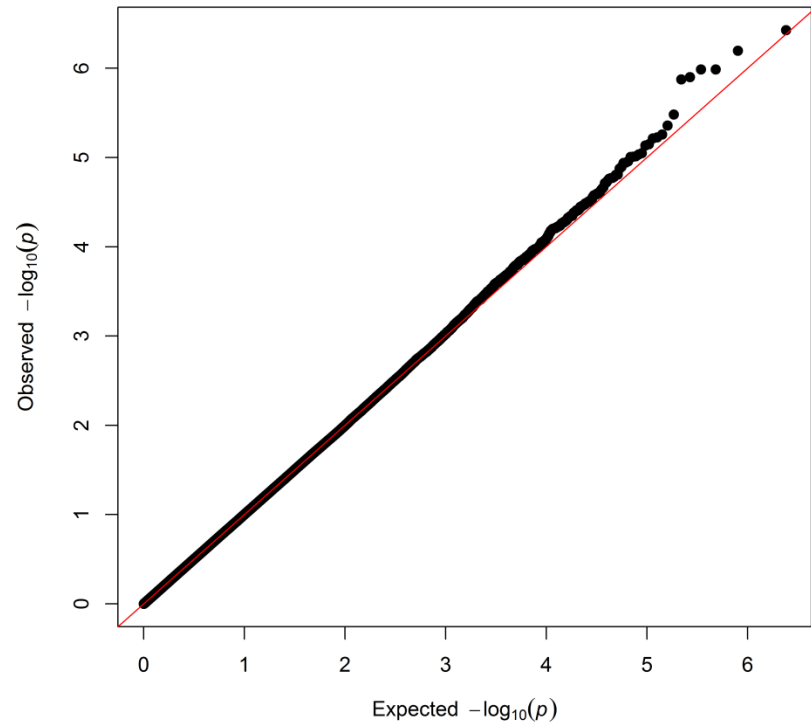

# (e) Change in BMI – Underweight at Baseline

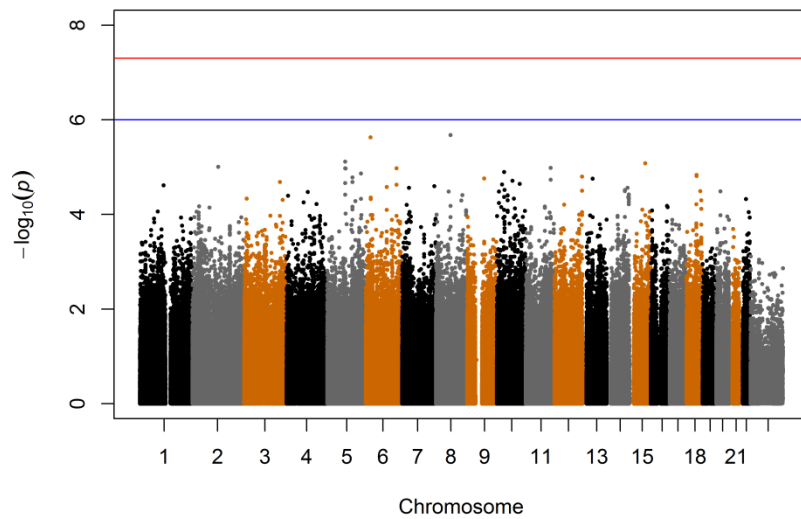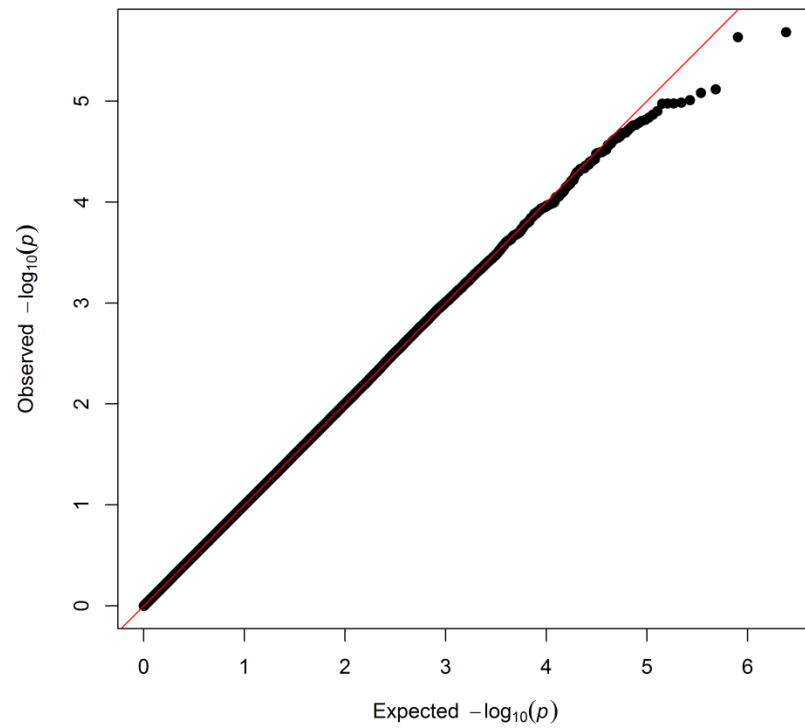

# (f) Change in BMI – Normal Weight at Baseline

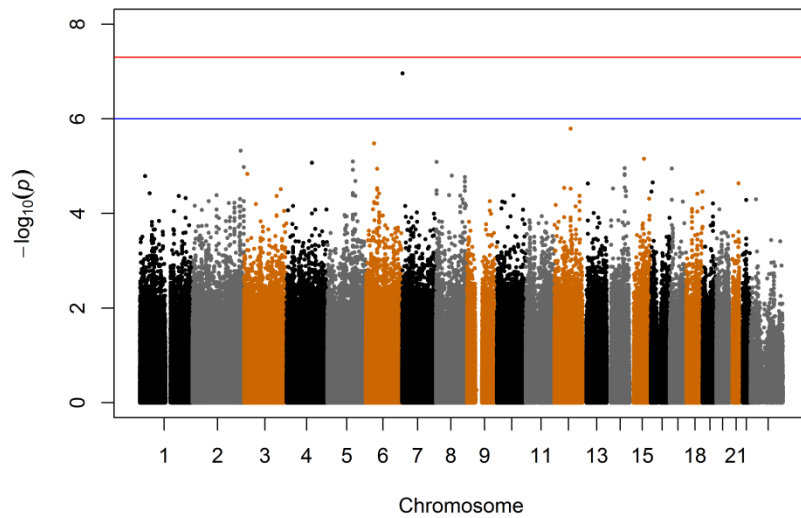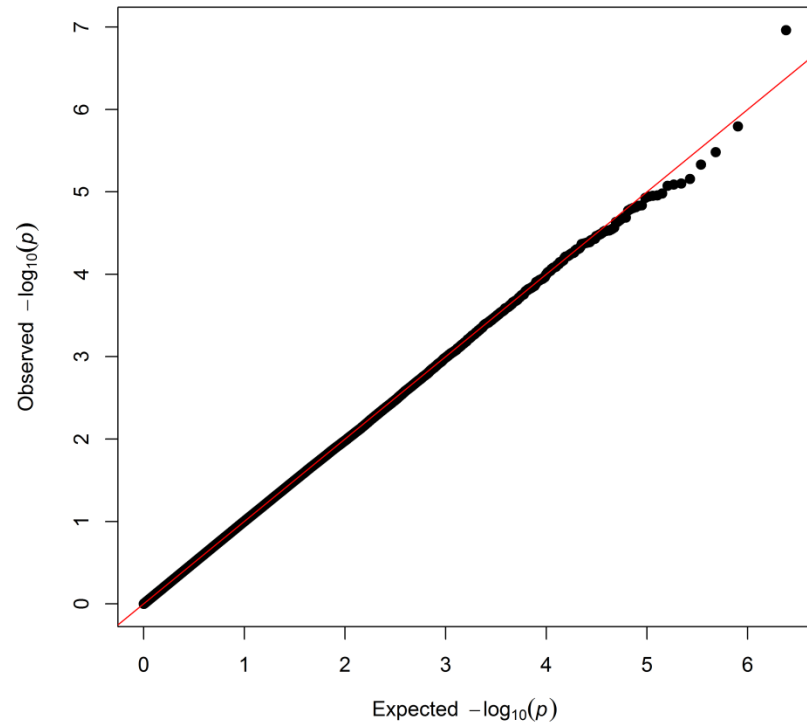

# (g) Change in BMI – Overweight at Baseline

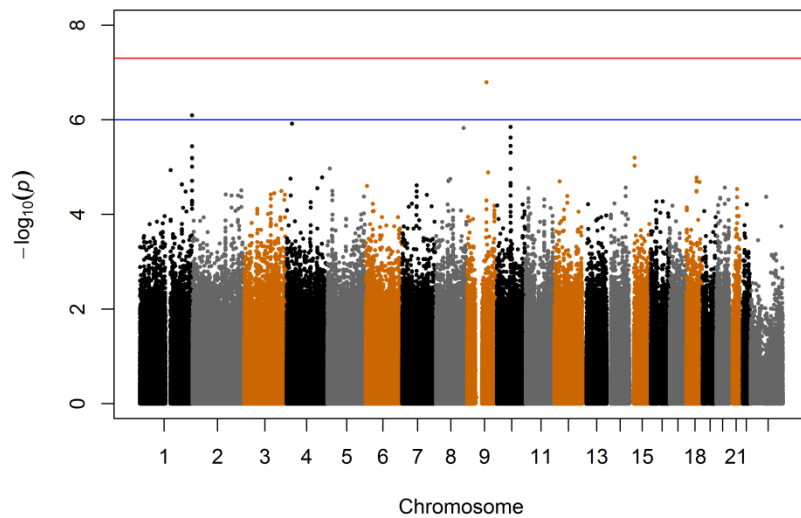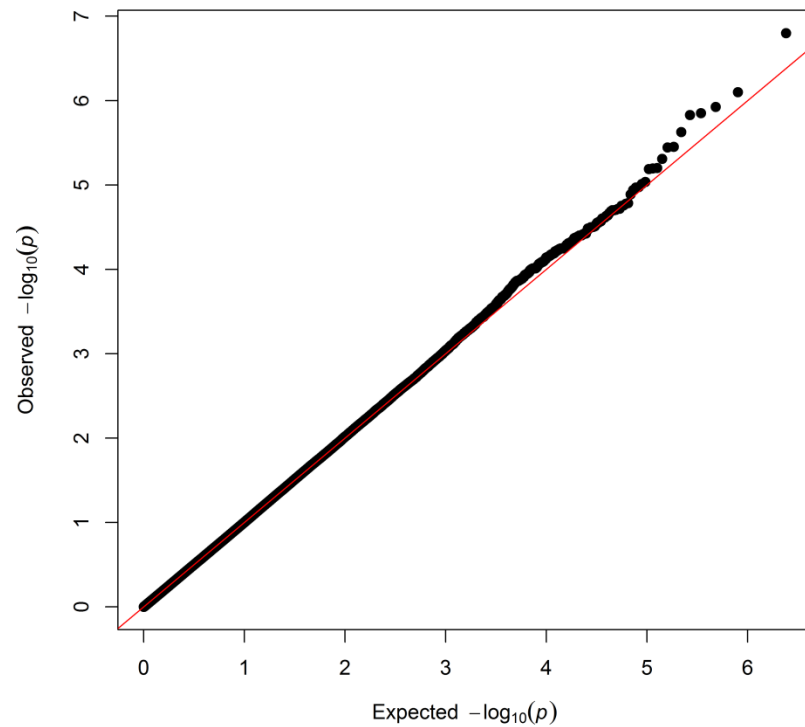

Supplement: pone.0105062.s003.pdf [file pone.0105062.s003.pdf]
