# Supplementary material for: Genome-Wide Association Studies and Heritability Estimates of Body Mass Index Related Phenotypes in Bangladeshi Adults
Source: PubMed Central journal article supplement (PMC4136799; doi:10.1371/journal.pone.0105062), 2014-08-18

# (a) BMI

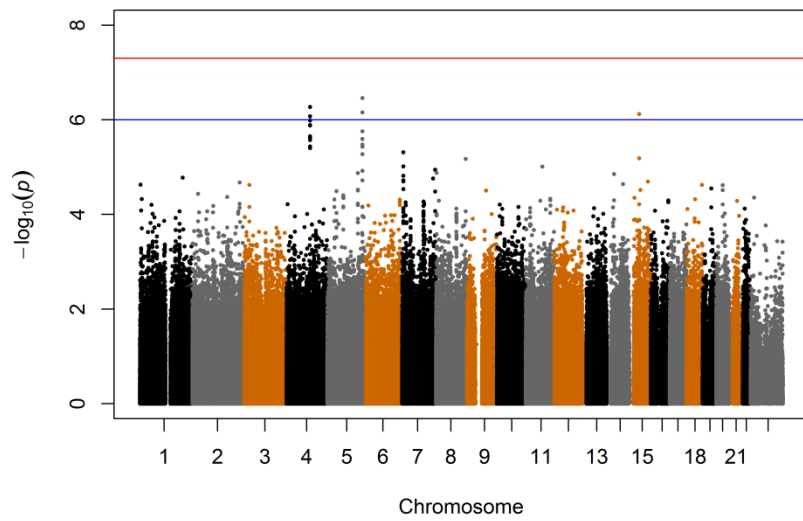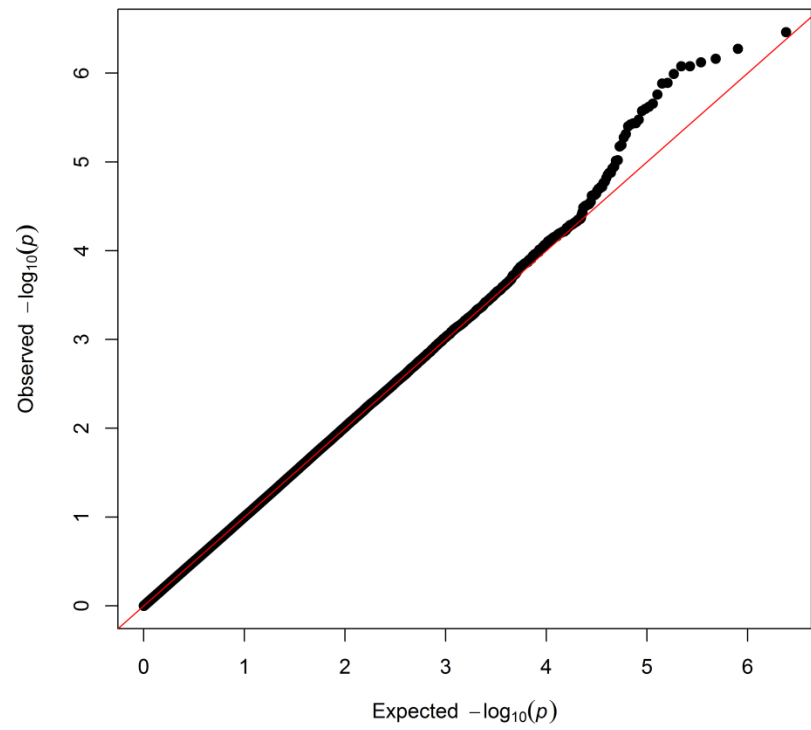

# (b) Height

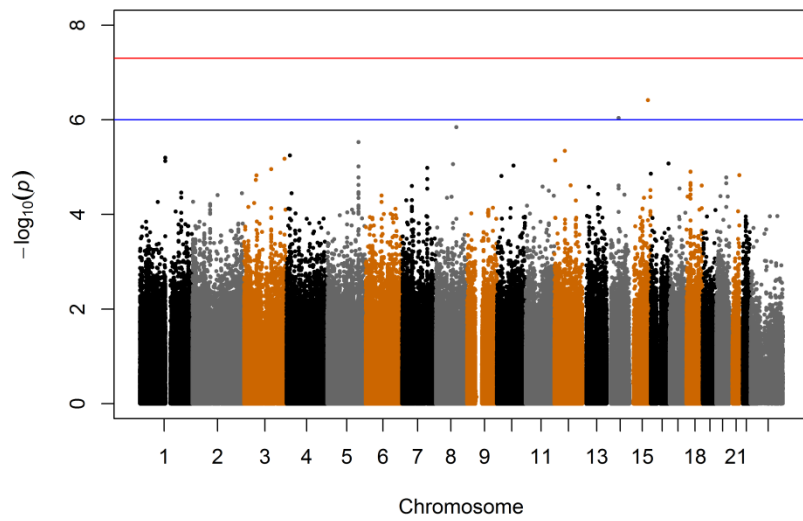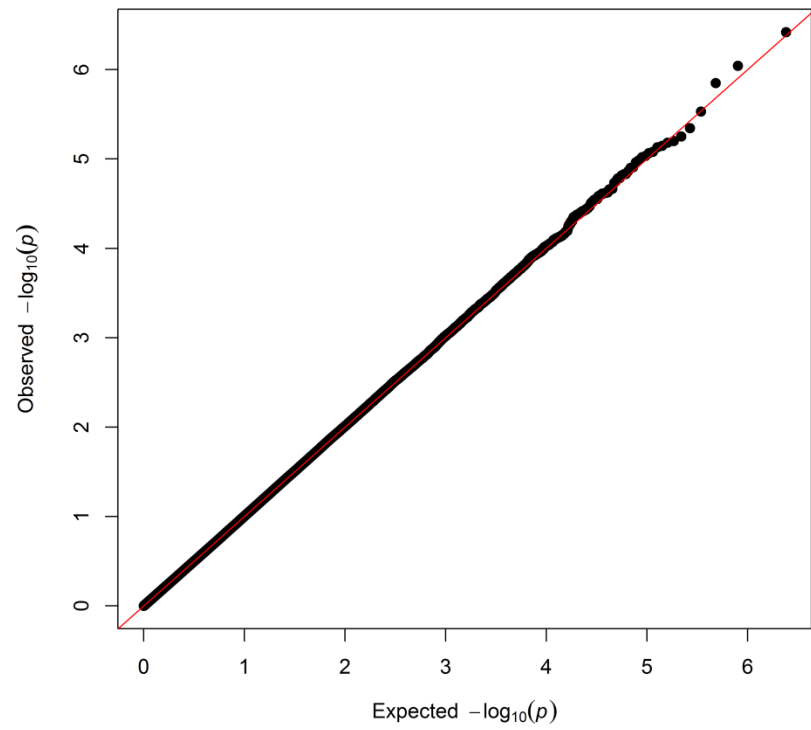

# (c) Underweight at Baseline

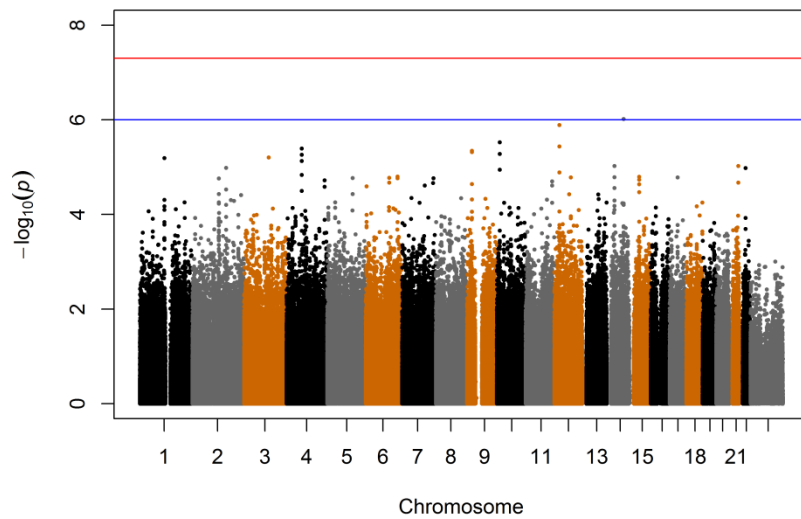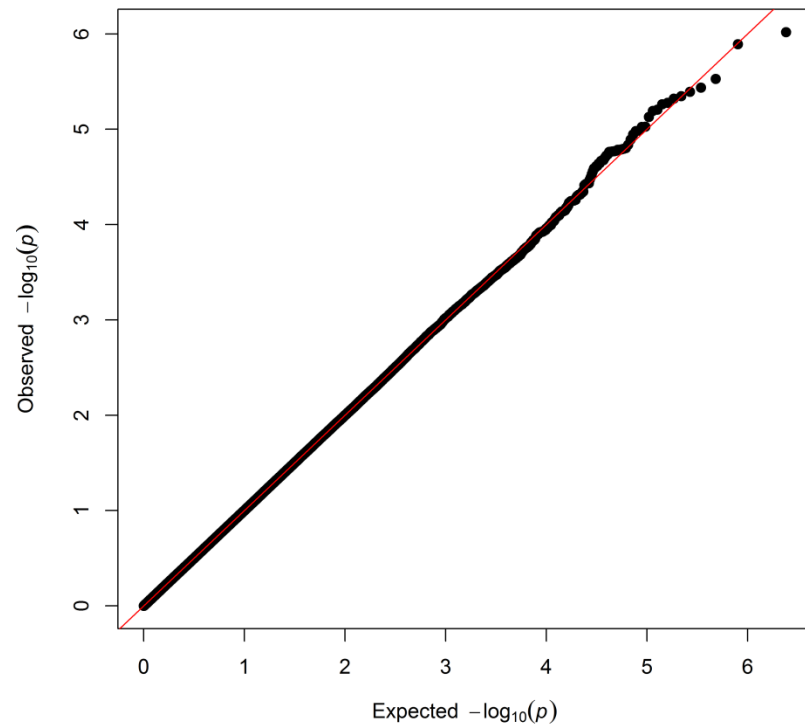

# (d) Overweight at Baseline

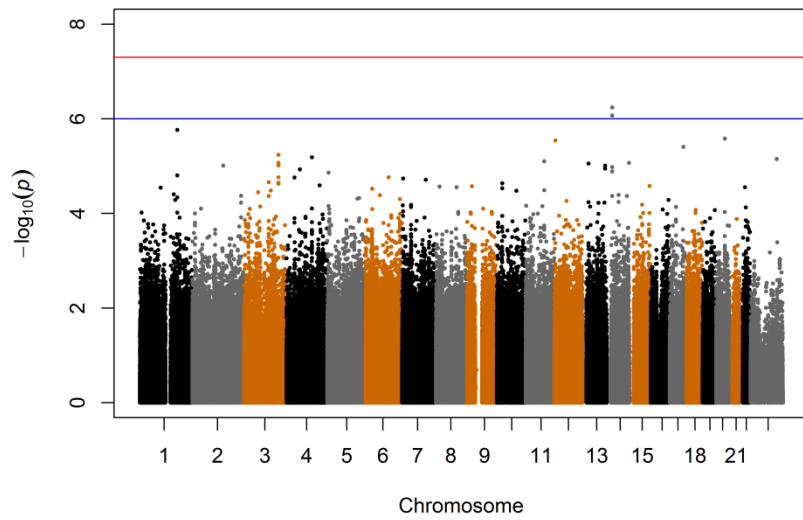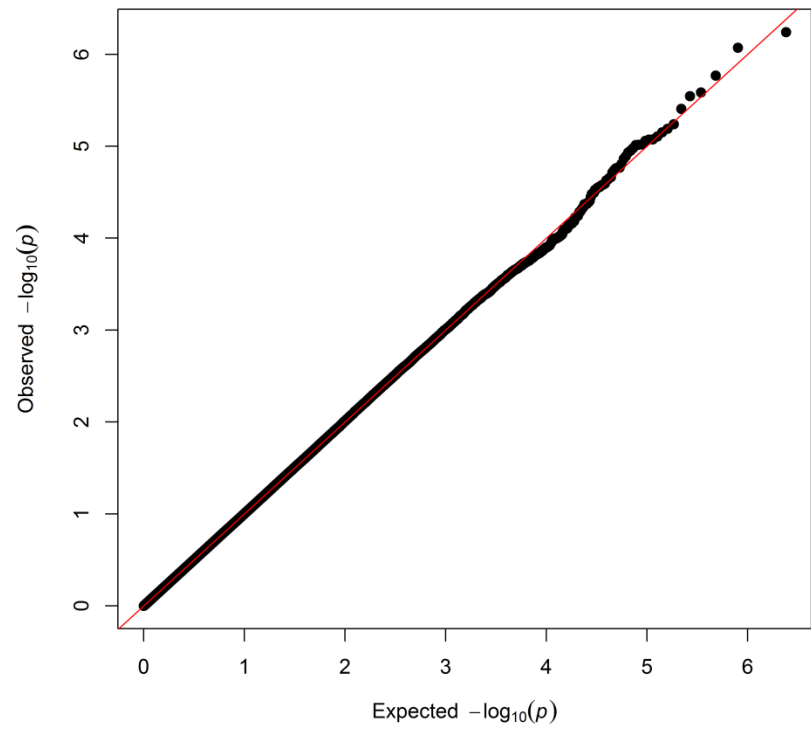

# (e) Change in BMI

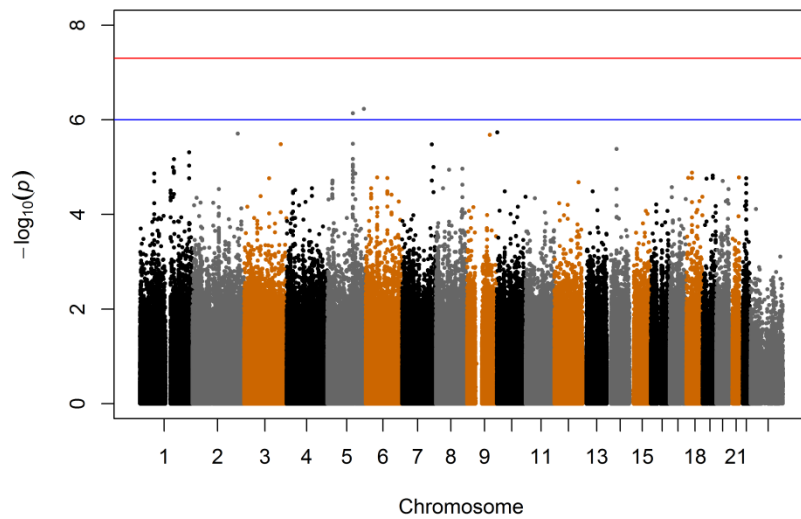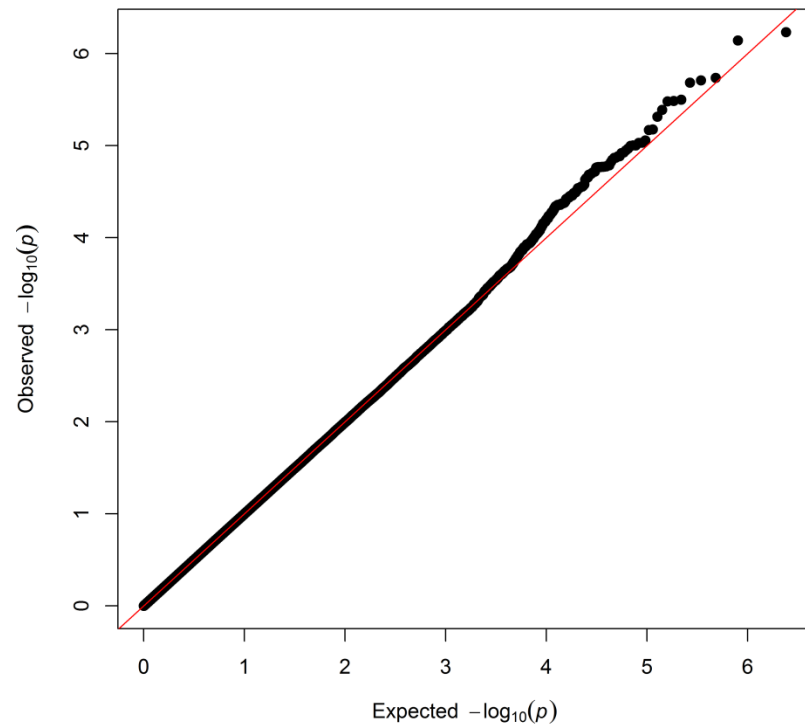

Supplement: pone.0105062.s001.pdf [file pone.0105062.s001.pdf]
