# Supplementary material for: Genome-Wide Association Studies and Heritability Estimates of Body Mass Index Related Phenotypes in Bangladeshi Adults
Source: PubMed Central journal article supplement (PMC4136799; doi:10.1371/journal.pone.0105062), 2014-08-18
Supplement: pone.0105062.s004.pdf [file pone.0105062.s004.pdf]

**Table S1: Characteristics of the Study Sample**

|                                                                 |           | <b>Combined<br/>N=5,354</b> | <b>Men<br/>n=2,591</b> | <b>Women<br/>n=2,763</b> |
|-----------------------------------------------------------------|-----------|-----------------------------|------------------------|--------------------------|
| Enrolled for HEALS                                              | count (%) | 3,364 (62.8)                | 1,516 (58.5)           | 1,848 (66.9)             |
| Enrolled for BEST                                               | count (%) | 1,990 (37.2)                | 1,075 (41.5)           | 915 (33.1)               |
| <b>Socio-demographic Measurements at Baseline</b>               |           |                             |                        |                          |
| Age (years)                                                     | mean (sd) | 40 (11.0)                   | 43 (10.9)              | 37 (10.4)                |
| Married                                                         | count (%) | 5,019 (93.7)                | 2,499 (96.5)           | 2,520 (91.2)             |
| Muslim Religion                                                 | count (%) | 5,121 (95.7)                | 2,469 (95.3)           | 2,652 (96.0)             |
| Owens Land                                                      | count (%) | 2,610 (48.8)                | 1,303 (50.3)           | 1,307 (47.3)             |
| Owens Television                                                | count (%) | 2,514 (47.0)                | 1,227 (47.4)           | 1,287 (46.6)             |
| Years of Education                                              | mean (sd) | 3.4 (4.0)                   | 4.0 (4.2)              | 2.9 (3.6)                |
| No Formal Education                                             | count (%) | 2,446 (45.7)                | 1,021 (39.4)           | 1,425 (51.6)             |
| Tobacco: never                                                  | count (%) | 3,319 (62.0)                | 754 (29.1)             | 2,565 (92.8)             |
| Tobacco: former                                                 | count (%) | 453 (8.5)                   | 366 (14.1)             | 87 (3.2)                 |
| Tobacco: current                                                | count (%) | 1,582 (29.6)                | 1,471 (56.8)           | 111 (4.0)                |
| Betel: never                                                    | count (%) | 3,225 (60.2)                | 1,579 (60.9)           | 1,646 (65.3)             |
| Betel: former                                                   | count (%) | 147 (2.8)                   | 102 (3.9)              | 45 (2.1)                 |
| Betel: current                                                  | count (%) | 1,982 (37.0)                | 910 (35.1)             | 1,072 (32.7)             |
| <b>Clinical Measurements at Baseline</b>                        |           |                             |                        |                          |
| Creatinine Adjusted Urinary Arsenic ( $\mu\text{g}/\text{gm}$ ) | mean (sd) | 293 (376)                   | 276 (352)              | 309 (397)                |
| Systolic Blood Pressure (mmHg)                                  | mean (sd) | 117 (17.5)                  | 117 (17.2)             | 117 (17.7)               |
| Diastolic Blood Pressure (mmHg)                                 | mean (sd) | 76 (11.0)                   | 76 (10.8)              | 76 (11.1)                |
| Hypertensive by Blood Pressure                                  | count (%) | 819 (15.3)                  | 380 (14.7)             | 439 (16.0)               |
| Height (m)                                                      | mean (sd) | 1.55 (0.08)                 | 1.61 (0.06)            | 1.50 (0.05)              |
| BMI ( $\text{kg}/\text{m}^2$ )                                  | mean (sd) | 19.9 (3.3)                  | 19.5 (3.0)             | 20.2 (3.4)               |
| Underweight                                                     | count (%) | 2,099 (39.3)                | 1,146 (44.3)           | 953 (34.6)               |
| Normal weight                                                   | count (%) | 2,375 (44.5)                | 1,106 (42.7)           | 1,269 (46.1)             |
| Overweight                                                      | count (%) | 869 (16.3)                  | 338 (13.1)             | 531 (19.3)               |
| <b>Clinical Measurements at First Followup</b>                  |           |                             |                        |                          |
| BMI ( $\text{kg}/\text{m}^2$ )                                  | mean (sd) | 20.1 (3.4)                  | 19.6 (3.1)             | 20.5 (3.6)               |
| Underweight                                                     | count (%) | 1,817 (36.5)                | 968 (41.4)             | 849 (32.1)               |
| Normal weight                                                   | count (%) | 2,237 (44.9)                | 1,045 (44.7)           | 1,192 (45.1)             |
| Overweight                                                      | count (%) | 930 (18.7)                  | 327 (14.0)             | 603 (22.8)               |

Information is missing for: religion (1 person); land ownership (1 person); TV ownership (1 person); urinary arsenic (33 people); systolic blood pressure (12 people); diastolic blood pressure (15 people); height (10 people); BMI (11 people); and BMI at first followup (103 people were lost due to followup, an additional 263 did not have their BMI recorded). Means and percentages are calculated for participants with non-missing information on that variable. High blood pressure is defined as measured systolic blood pressure 140 or above, or diastolic blood pressure 90 or above.

BMI is classified as: underweight (BMI < 18.5); normal weight (18.5 <= BMI < 23); or overweight (BMI >= 23).
