# Supplementary material for: Genome-Wide Association Studies and Heritability Estimates of Body Mass Index Related Phenotypes in Bangladeshi Adults
Source: PubMed Central journal article supplement (PMC4136799; doi:10.1371/journal.pone.0105062), 2014-08-18
Supplement: pone.0105062.s005.pdf [file pone.0105062.s005.pdf]

**Table S2: Top Associations between SNVs and BMI and change in BMI over two years, by BMI status of the participant at baseline**

|                      | subset                            | n analyzed | Chr | SNV        | position  | context                                                        | nearest gene (s)     | RA | AA | RAF   | $\beta$ | se    | p-value  |
|----------------------|-----------------------------------|------------|-----|------------|-----------|----------------------------------------------------------------|----------------------|----|----|-------|---------|-------|----------|
| <b>BMI</b>           | Underweight at Baseline           | 2,099      | 4   | rs17276701 | 153322015 | intergenic                                                     | PET112,FBXW7         | C  | T  | 0.238 | 0.219   | 0.042 | 1.50E-07 |
| <b>BMI</b>           | Normal Weight at Baseline         | 2,375      |     |            |           | No variants were associated with a p-value less than $10^{-6}$ |                      |    |    |       |         |       |          |
| <b>BMI</b>           | Overweight at Baseline            | 869        | 14  | rs35478231 | 71209132  | intronic                                                       | SIPA1L1              | A  | G  | 0.012 | 2.796   | 0.469 | 3.73E-09 |
| <b>BMI</b>           | Overweight at Baseline            | 869        | 6   | rs370321   | 95053994  | intergenic                                                     | TSG1,MANEA           | C  | A  | 0.159 | 0.838   | 0.142 | 5.51E-09 |
| <b>BMI</b>           | Overweight at Baseline            | 869        | 7   | rs3735505  | 73453696  | intronic                                                       | CLIP2                | G  | A  | 0.013 | 2.673   | 0.475 | 2.47E-08 |
| <b>BMI</b>           | Overweight at Baseline            | 869        | 3   | rs12492931 | 17925031  | intergenic                                                     | TBC1D5,LOC339862     | T  | C  | 0.054 | 1.276   | 0.237 | 9.20E-08 |
| <b>BMI</b>           | Overweight at Baseline            | 869        | 8   | rs7818865  | 1008657   | ncRNA                                                          | ERICH1-AS1           | T  | C  | 0.051 | 1.325   | 0.247 | 1.01E-07 |
| <b>BMI</b>           | Overweight at Baseline            | 869        | 2   | rs11675512 | 103971651 | intergenic                                                     | TMEM182,LOC100287010 | T  | A  | 0.012 | 2.531   | 0.488 | 2.72E-07 |
| <b>BMI</b>           | Overweight at Baseline            | 869        | 12  | rs17700494 | 4357652   | intronic                                                       | FGF23                | T  | G  | 0.010 | 2.642   | 0.522 | 5.15E-07 |
| <b>BMI</b>           | Overweight at Baseline            | 869        | 13  | rs17749200 | 33405157  | intronic                                                       | RFC3                 | C  | A  | 0.036 | 1.442   | 0.288 | 6.92E-07 |
| <b>BMI</b>           | Overweight at Baseline            | 869        | 7   | rs12700045 | 19400327  | intergenic                                                     | FERD3L,TWISTNB       | T  | G  | 0.064 | 1.067   | 0.214 | 7.31E-07 |
| <b>BMI</b>           | Overweight at Baseline            | 869        | 10  | rs11597150 | 128282594 | intergenic                                                     | C10orf90,DOCK1       | A  | G  | 0.013 | 2.351   | 0.476 | 9.52E-07 |
| <b>BMI</b>           | Overweight at Baseline            | 869        | 7   | rs4391322  | 19396112  | intergenic                                                     | FERD3L,TWISTNB       | A  | G  | 0.068 | 1.024   | 0.208 | 9.97E-07 |
| <b>BMI</b>           | Overweight at Baseline-No Outlier | 868        | 2   | rs16866078 | 225188202 | intergenic                                                     | CUL3,DOCK10          | G  | A  | 0.033 | 1.404   | 0.274 | 3.74E-07 |
| <b>BMI</b>           | Overweight at Baseline-No Outlier | 868        | 14  | rs2896108  | 88934601  | intronic                                                       | FOXN3                | A  | C  | 0.325 | 0.527   | 0.105 | 6.36E-07 |
| <b>Change in BMI</b> | Underweight at Baseline           | 1,936      |     |            |           | No variants were associated with a p-value less than $10^{-6}$ |                      |    |    |       |         |       |          |
| <b>Change in BMI</b> | Normal Weight at Baseline         | 2,228      | 7   | rs34519622 | 2320868   | upstream                                                       | SNX8                 | G  | A  | 0.802 | 0.273   | 0.051 | 9.49E-08 |
| <b>Change in BMI</b> | Overweight at Baseline            | 819        | 9   | rs9410482  | 91244369  | intronic                                                       | SEMA4D               | C  | T  | 0.926 | 0.834   | 0.160 | 2.23E-07 |
| <b>Change in BMI</b> | Overweight at Baseline            | 819        | 1   | rs11582097 | 245101654 | intronic                                                       | AHCTF1               | A  | G  | 0.327 | 0.444   | 0.089 | 8.06E-07 |

AA: Alternative Allele; the allele associated with a decrease in the phenotype; BMI: Body Mass Index; Chr.: Chromosome; Overweight: BMI  $\geq 23$  kg/m<sup>2</sup>, compared to normal weight; Position: From build 36.1; RA: Risk allele; the allele associated with an increase in the phenotype; RAF: Risk Allele Frequency; SNV: Single Nucleotide Variant; se: Standard Error; Underweight: BMI < 18.5 kg/m<sup>2</sup>, compared to normal weight
