# Supplementary material for: Genome-Wide Association Studies and Heritability Estimates of Body Mass Index Related Phenotypes in Bangladeshi Adults
Source: PubMed Central journal article supplement (PMC4136799; doi:10.1371/journal.pone.0105062), 2014-08-18
Supplement: pone.0105062.s006.pdf [file pone.0105062.s006.pdf]

**Table S3: Heritability Estimates for BMI and change in BMI over two years, stratifying by overweight status of participant at baseline**

| Phenotype and Subset                      | Using Whole Population |                                  |       |                                    | Excluding related > 0.025 |            |                                    |       |
|-------------------------------------------|------------------------|----------------------------------|-------|------------------------------------|---------------------------|------------|------------------------------------|-------|
|                                           | n analyzed             | Estimate of $h^2$ <sup>(a)</sup> | se    | Estimate of $h_g^2$ <sup>(b)</sup> | se                        | n analyzed | Estimate of $h_g^2$ <sup>(c)</sup> | se    |
| BMI - Underweight at Baseline             | 2,099                  | 0.227                            | 0.127 | 0.110                              | 0.098                     | 781        | 0.000                              | 0.447 |
| BMI - Normal Weight at Baseline           | 2,375                  | 0.299                            | 0.147 | 0.274                              | 0.105                     | 955        | 0.036                              | 0.355 |
| BMI - Overweight at Baseline              | 869                    | 0.182                            | 0.192 | 0.284                              | 0.180                     | 389        | 1.000                              | 0.903 |
| BMI - Overweight at Baseline-no Outlier   | 868                    | 0.333                            | 0.294 | 0.480                              | 0.232                     | 389        | 1.000                              | 0.903 |
| Change in BMI - Underweight at Baseline   | 1,936                  | 0.375                            | 0.175 | 0.189                              | 0.127                     | 717        | 0.000                              | 0.508 |
| Change in BMI - Normal Weight at Baseline | 2,228                  | 0.334                            | 0.171 | 0.341                              | 0.117                     | 899        | 0.768                              | 0.395 |
| Change in BMI - Overweight at Baseline    | 819                    | 0.191                            | 0.293 | 0.352                              | 0.238                     | 365        | 0.000                              | 0.902 |

se: standard error

(a) estimate of the full narrow sense heritability, calculated using GCTA, but replacing the full related matrix with a modified one that assumes zero relatedness between participants whose estimated relatedness is less than 0.05

(b) estimate of the amount of variance in the trait that was explained by the interrogated SNVs in a linear model, using the relatedness matrix calculated by GCTA, and using all participants

(c) estimate of the amount of variance in the trait that was explained by the interrogated SNVs in a linear model, using the relatedness matrix calculated by GCTA, and including only one participant of any pair where the estimated kinship coefficient was larger than 0.025 (2nd-3rd cousins)
